# Supplementary material
Source: MDPI journal article supplement (https://www.mdpi.com/2071-1050/16/9/3519)

## Supplementary Materials

**Table S1.** Test-retest reliability of the adapted SUS-FCQ.

|                      |        | Mean $\pm$ SD   | Median (min - max) | Test ist. | p     | ICC (%95 CI)                               |
|----------------------|--------|-----------------|--------------------|-----------|-------|--------------------------------------------|
| <b>Factor 1</b>      | Test   | 5.71 $\pm$ 1.47 | 6.00 (1.00 – 7.00) | -0.54     | 0.589 | 0.629 (0.373 – 0.78)<br><b>p&lt;0.001</b>  |
|                      | Retest | 5.59 $\pm$ 1.45 | 6.00 (2.00 – 7.00) |           |       |                                            |
| <b>Factor 2</b>      | Test   | 5.77 $\pm$ 1.33 | 6.00 (1.00 – 7.00) | -0.533    | 0.594 | 0.583 (0.384 – 0.730)<br><b>p&lt;0.001</b> |
|                      | Retest | 5.53 $\pm$ 1.54 | 5.90 (1.50 – 7.00) |           |       |                                            |
| <b>General score</b> | Test   | 5.85 $\pm$ 1.28 | 6.17 (1.00 – 7.00) | -0.454    | 0.650 | 0.516 (0.299 – 0.682)<br><b>p&lt;0.001</b> |
|                      | Retest | 5.57 $\pm$ 1.46 | 6.00 (2.00 – 7.00) |           |       |                                            |

**Path diagram S1**

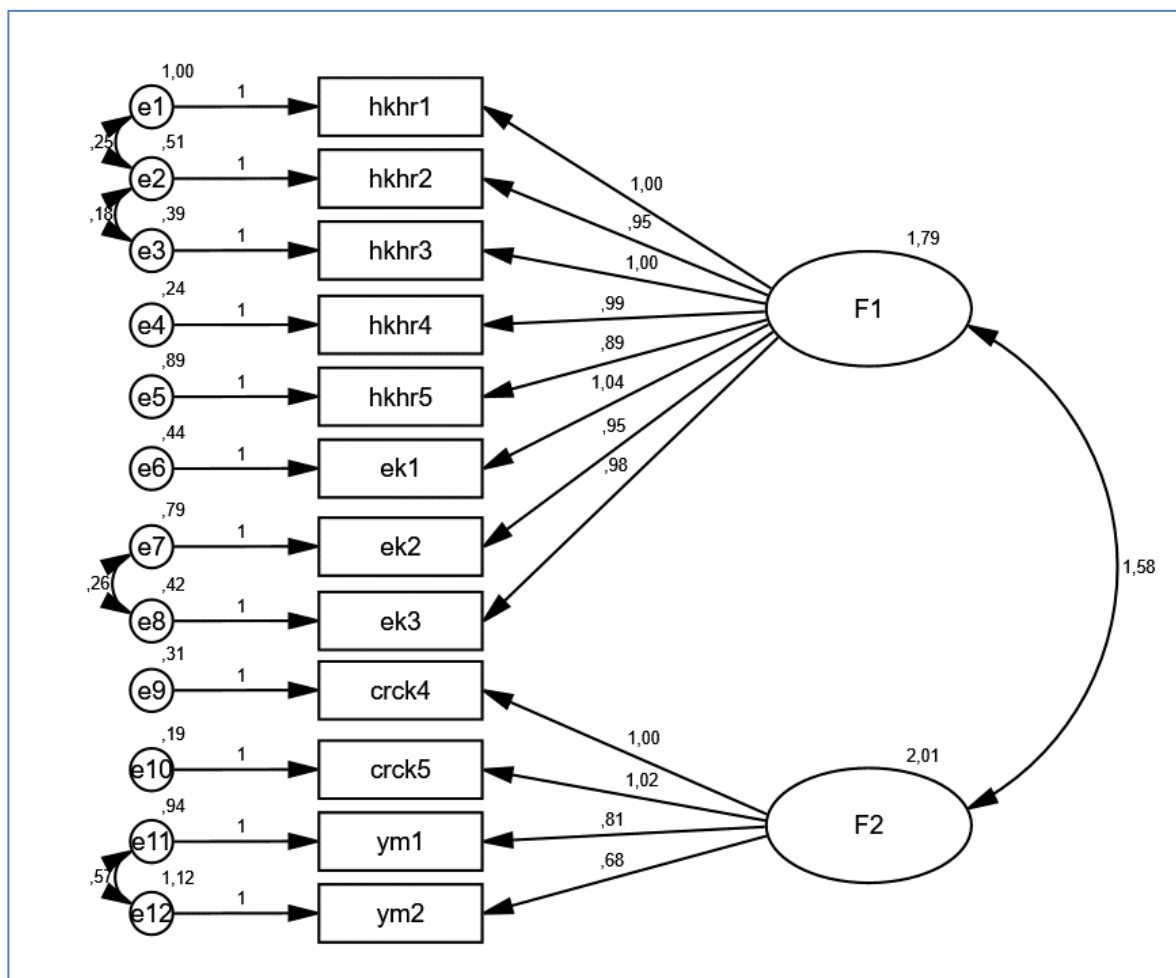

Path diagram S2

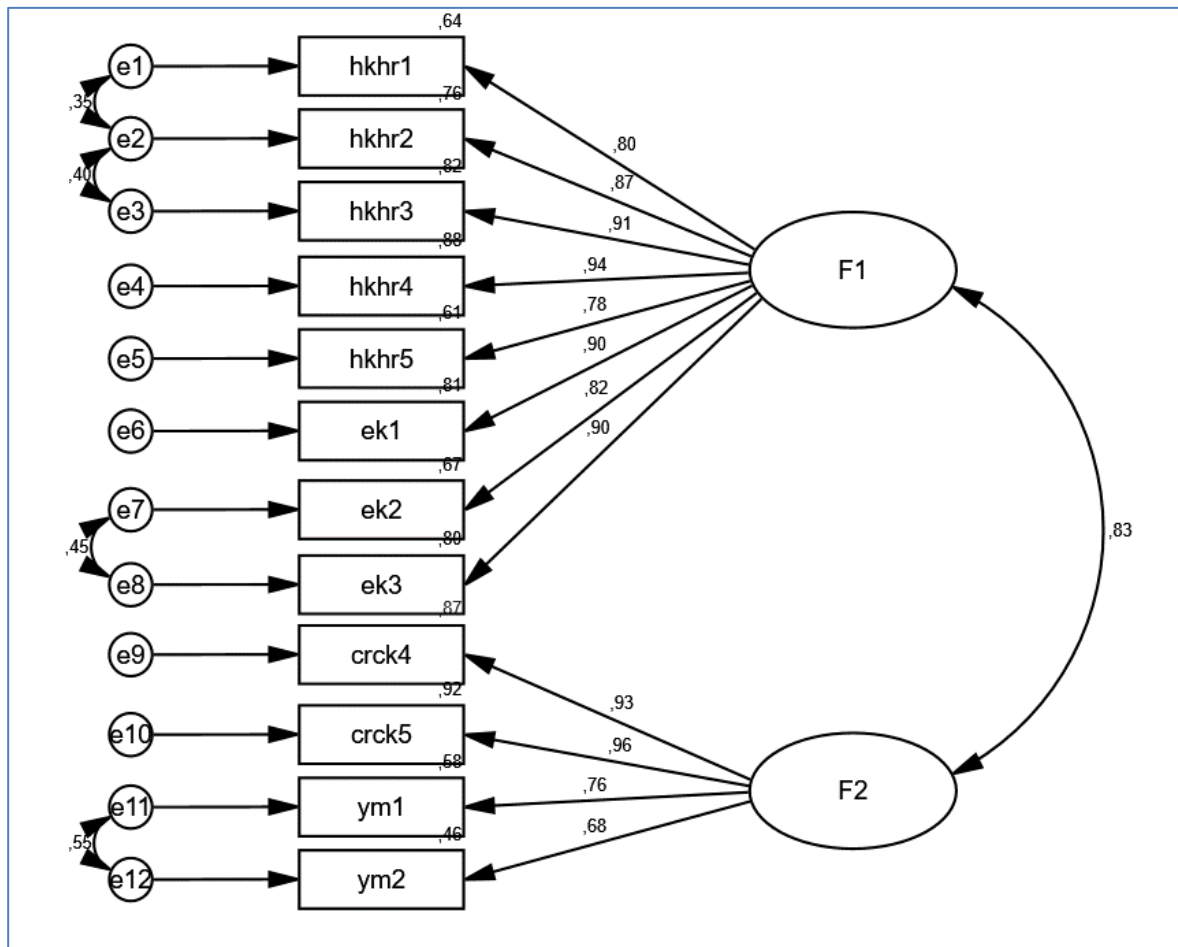

Supplement: s1 [file s1]
